# Supplementary material for: Trust and Trade-Offs in Sharing Data for Precision Medicine: A National Survey of Singapore
Source: MDPI journal article supplement (doi:10.3390/jpm11090921), 2021-09-16
Supplement: s1 [file s1]

# Supplementary Figures

Supplementary Figure S1 (s1). Part-worth utilities of the attribute levels by gender from the ACBC analysis. The width of the boxes corresponds with 95% confidence intervals.

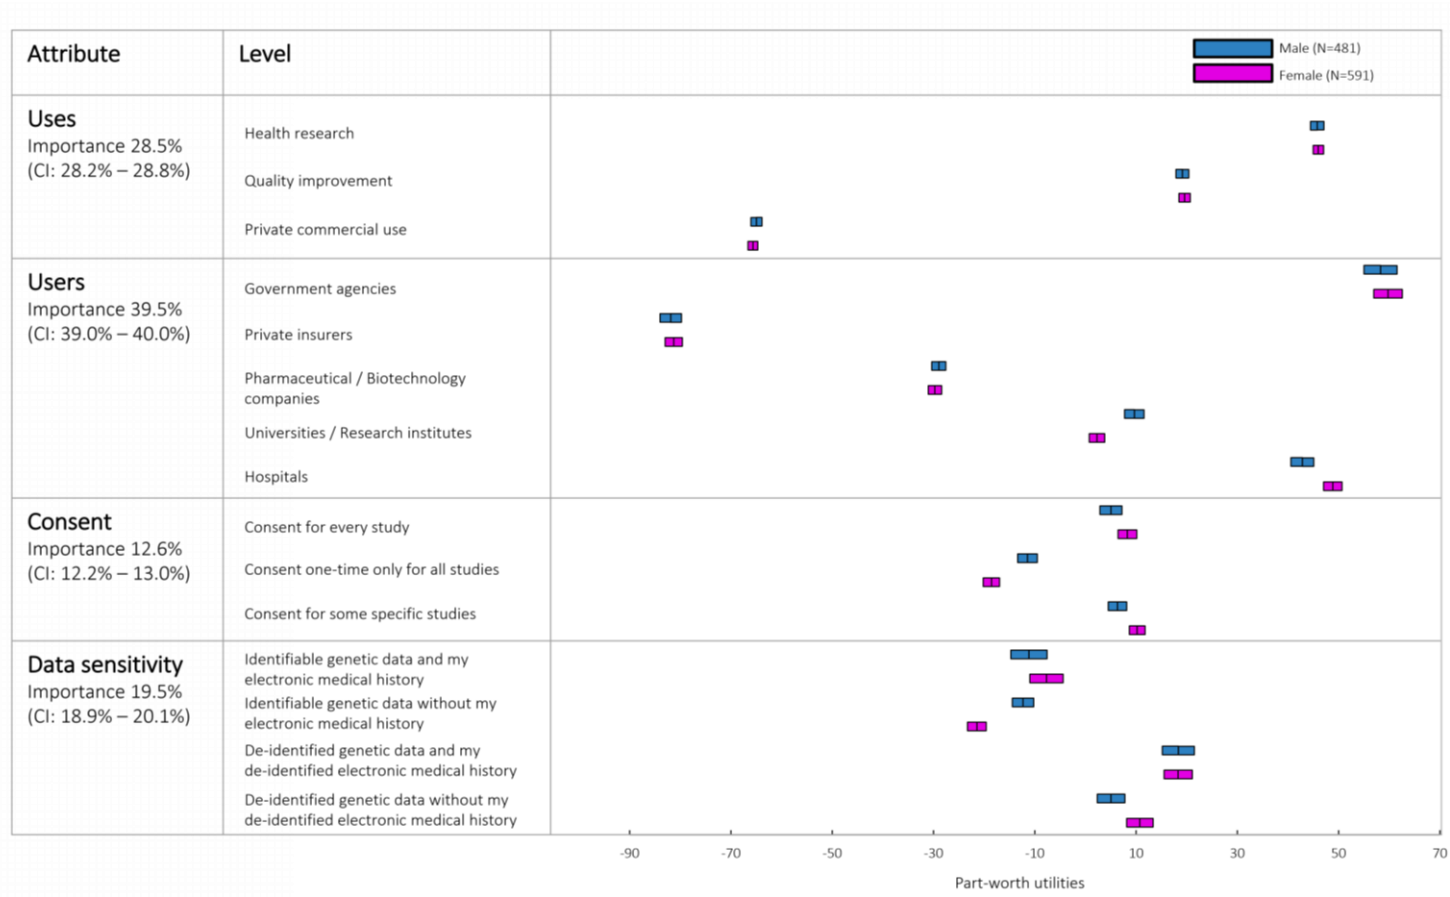

Supplementary Figure S2 (s2). Part-worth utilities of the attribute levels by ethnicity from the ACBC analysis. The width of the boxes corresponds with 95% confidence intervals.

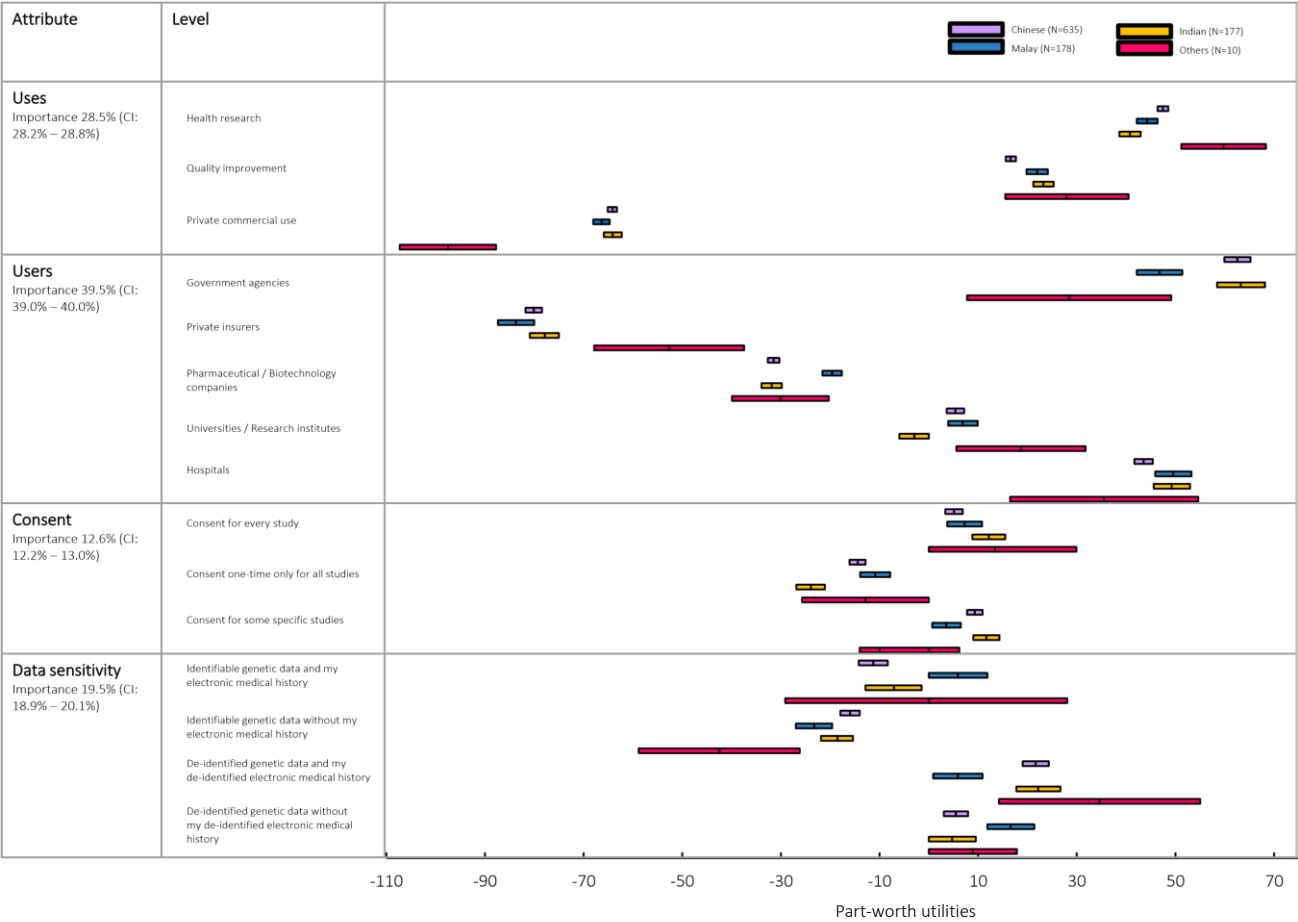

Supplementary Figure S3 (s3). Part-worth utilities of the attribute levels by religion from the ACBC analysis. The width of the boxes corresponds with 95% confidence intervals.

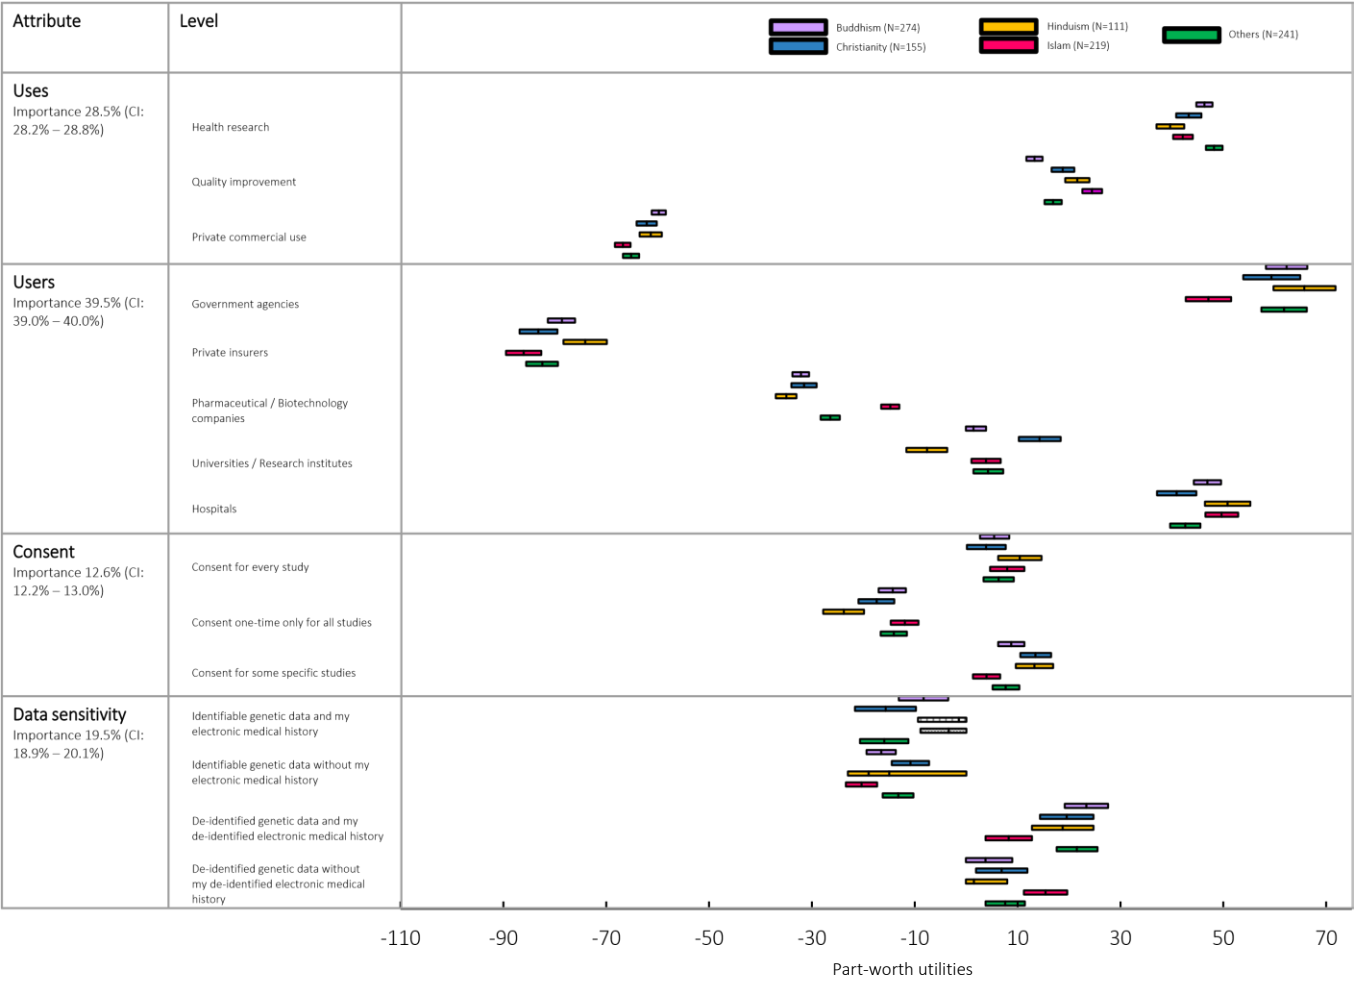

Supplementary Figure S4 (s4). Part-worth utilities of the attribute levels by age from the ACBC analysis. The width of the boxes corresponds with 95% confidence intervals.

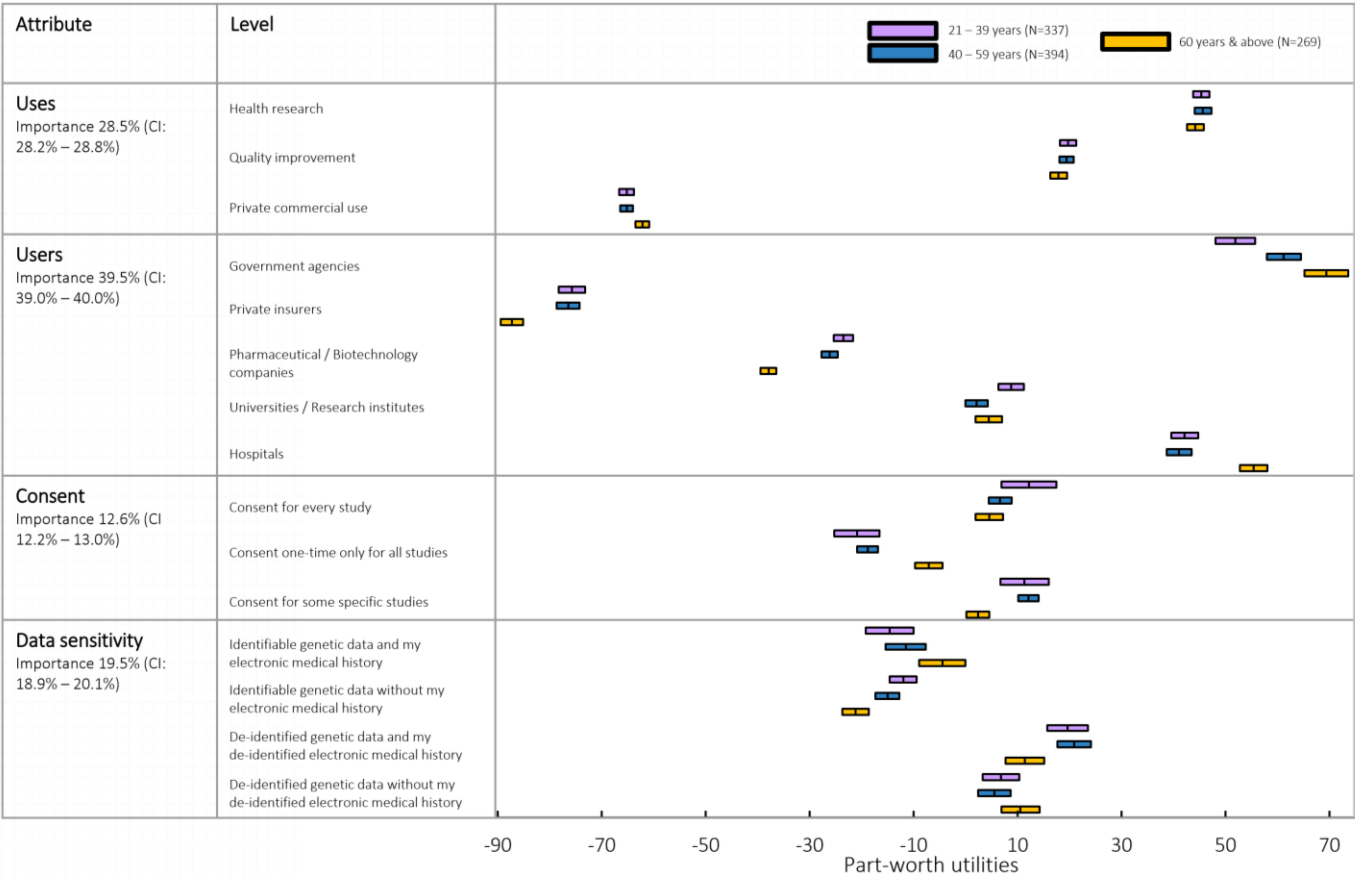

Supplementary Figure S5 (s5). Part-worth utilities of the attribute levels by education from the ACBC analysis. The width of the boxes corresponds with 95% confidence intervals.

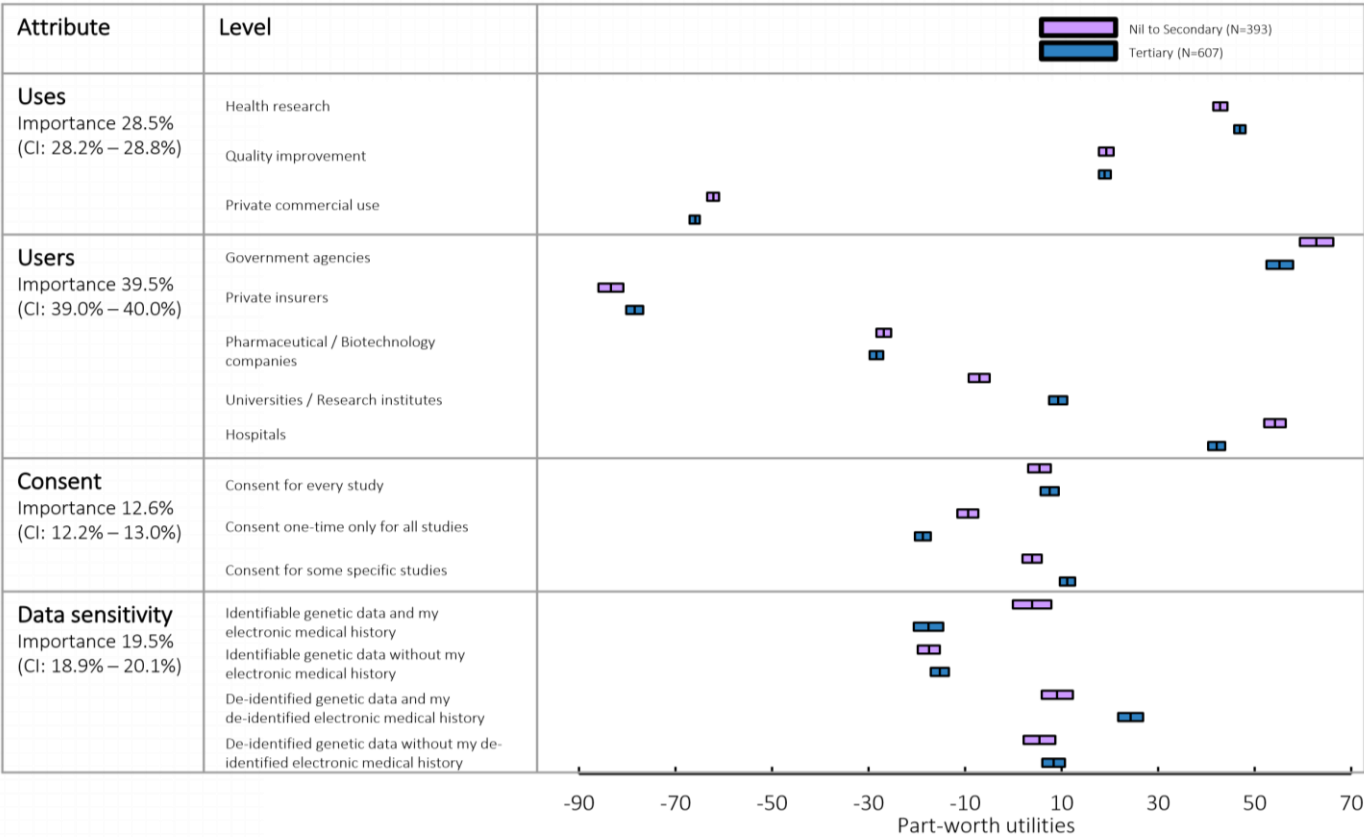

Supplementary Figure S6 (s6). Part-worth utilities of the attribute levels by self-reported health from the ACBC analysis. The width of the boxes corresponds with 95% confidence intervals.

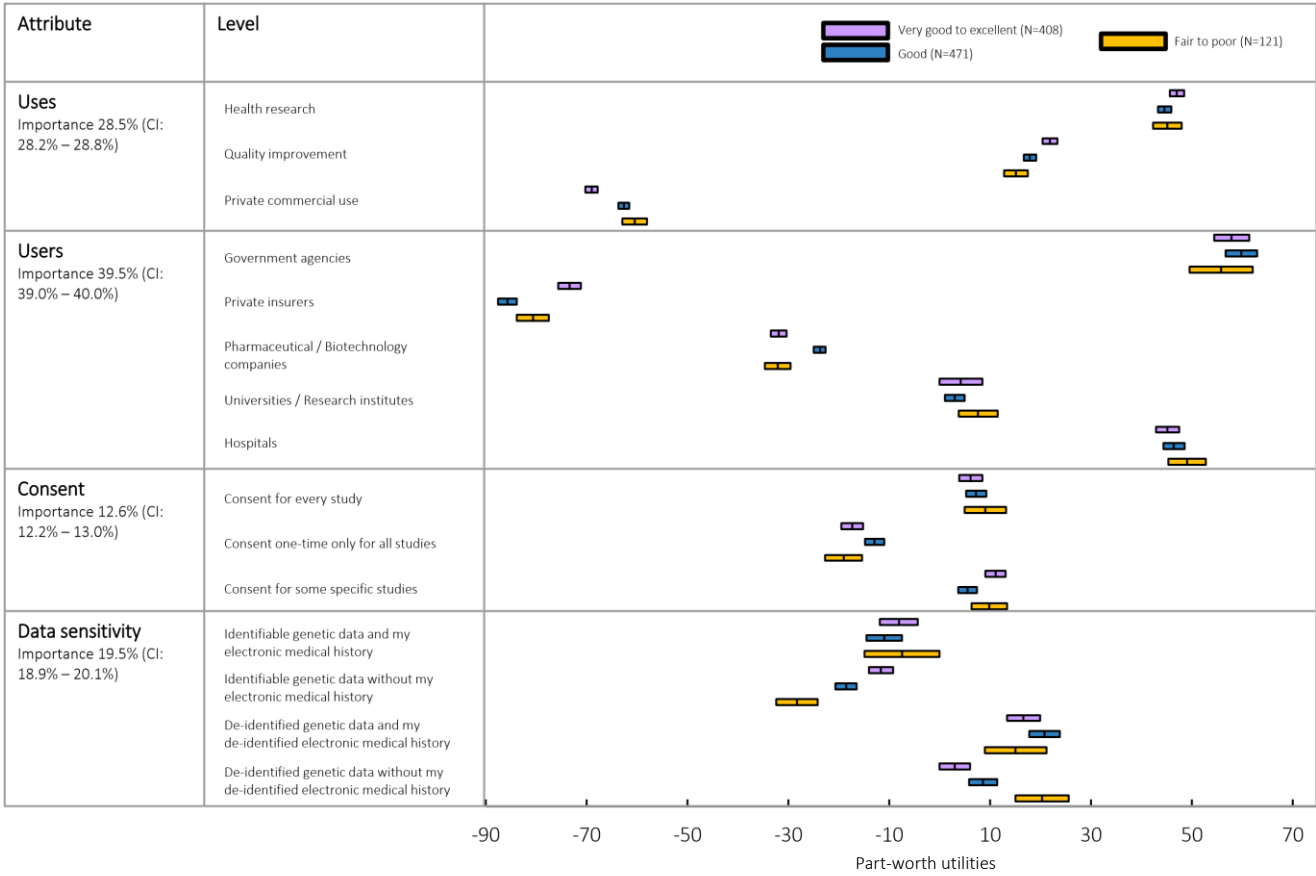

Supplementary Figure S7 (s7). Part-worth utilities of the attribute levels by housing type from the ACBC analysis. The width of the boxes corresponds with 95% confidence intervals.

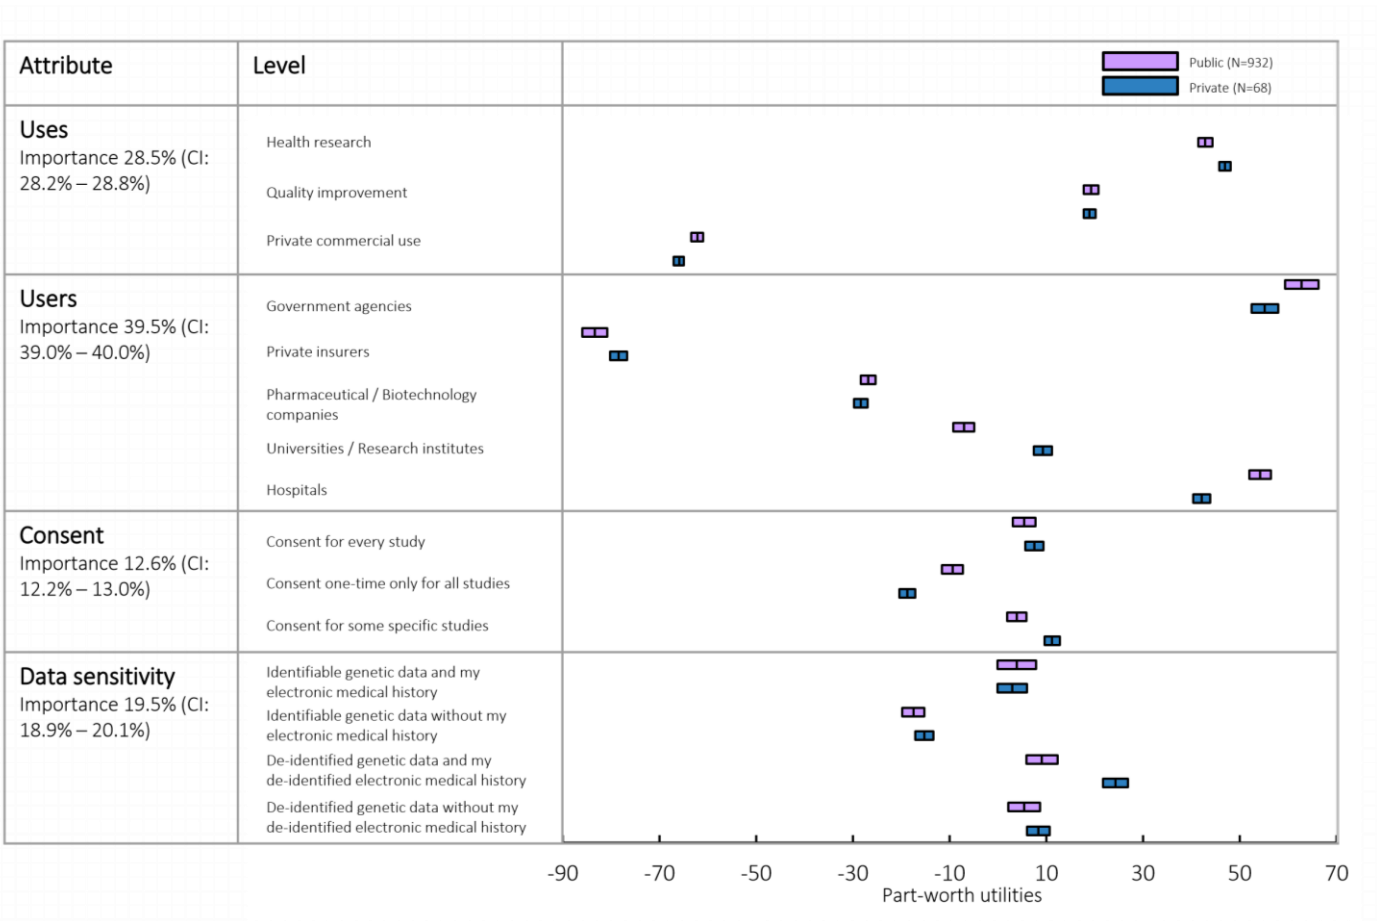

Supplementary Figure S8 (s8). Part-worth utilities of the attribute levels by income from the ACBC analysis. The width of the boxes corresponds with 95% confidence intervals.

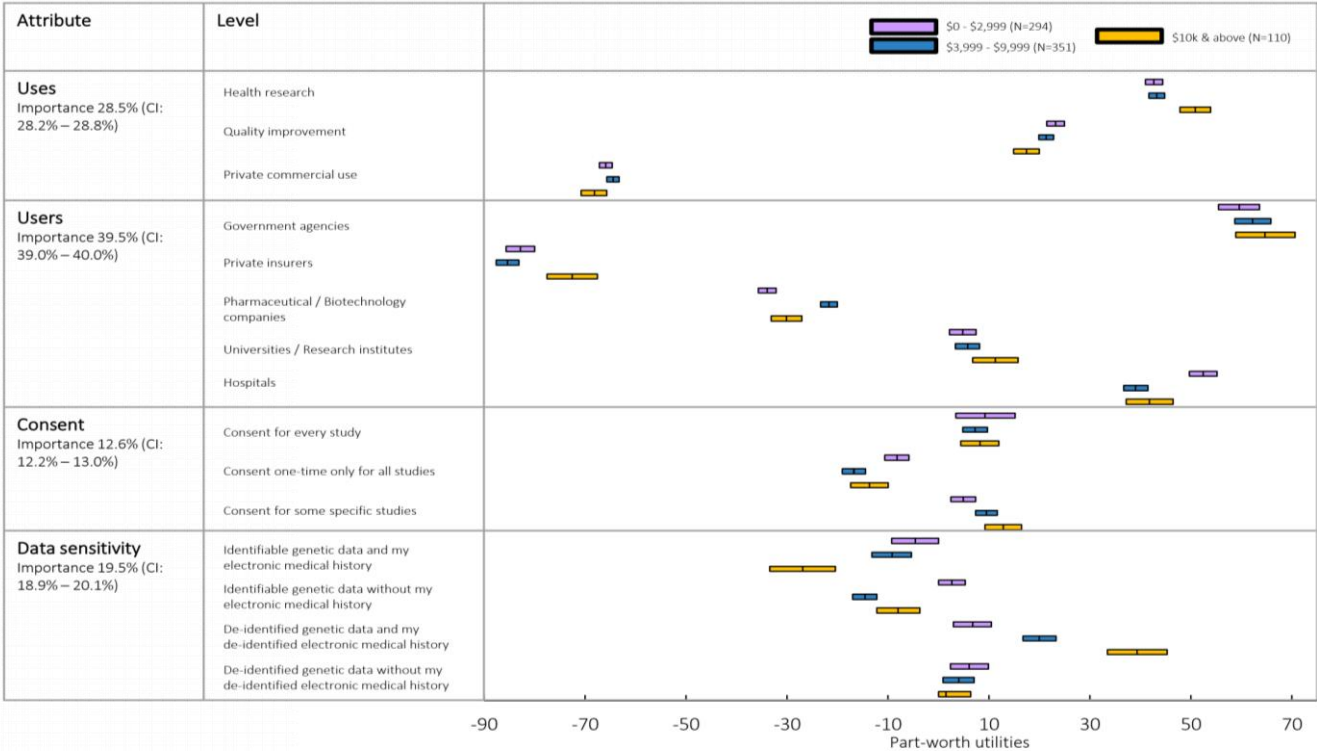



## Supplementary Tables

Supplementary Table S1 (st1). Sampling frame provided by Department of Statistics Singapore (2019) for sample size N=1,000 by age, gender, and ethnicity, with oversampling of Malay and Indian respondents.

| Age bracket                  | Chinese    |            | Malay      |           | Indian & Others |           |
|------------------------------|------------|------------|------------|-----------|-----------------|-----------|
|                              | Male       | Female     | Male       | Female    | Male            | Female    |
| 21-29                        | 44         | 43         | 18         | 19        | 15              | 10        |
| 30-39                        | 48         | 58         | 18         | 18        | 19              | 27        |
| 40-49                        | 53         | 69         | 12         | 18        | 26              | 21        |
| 50-59                        | 61         | 62         | 19         | 17        | 20              | 16        |
| 60-69                        | 59         | 55         | 12         | 14        | 11              | 11        |
| 70 & above                   | 36         | 47         | 5          | 8         | 5               | 6         |
| <b>Total for each gender</b> | <b>301</b> | <b>334</b> | <b>84</b>  | <b>94</b> | <b>96</b>       | <b>91</b> |
| <b>Total for each race</b>   | <b>635</b> |            | <b>178</b> |           | <b>187</b>      |           |

Supplementary Table S2 (st2). Calculation of response rate based on American Association for Public Opinion Research (AAPOR) standards.<sup>1</sup>

|                                                                                                                                         |                                       |
|-----------------------------------------------------------------------------------------------------------------------------------------|---------------------------------------|
| Estimated proportion of doors knocked on that did not result in a (partial) interview                                                   | 72%                                   |
| Complete interviews (I)                                                                                                                 | 1000                                  |
| Partial interviews (P)                                                                                                                  | 55                                    |
| Number of doors knocked that did not result in a (partial) interview (NI)                                                               | $(I + P) / (1 - 0.72) - I - P = 2713$ |
| Estimated proportion of NI who refused interviews                                                                                       | 15%                                   |
| Estimated proportion of NI who were determined to be not eligible                                                                       | 25%                                   |
| Estimated proportion of NI who did not open the door                                                                                    | 60%                                   |
| Refused interviews (R)                                                                                                                  | $0.15 * NI = 407$                     |
| Unknown if the door knocked on contains an eligible household member (i.e. door was not opened.) (UH)                                   | $0.60 * NI = 1628$                    |
| Estimated proportion of UH that are eligible (e)                                                                                        | $1 - 0.25 * NI / (I + P + R) = 54\%$  |
| Minimum response rate (RR1) (This counts all unopened doors as non-responses.)                                                          | $I / (I + P + R + UH) = 32\%$         |
| Maximum response rate (RR3) (This response rate can be considered conservative as it counts those that were not home as non-responses.) | $I / (I + P + R + e*UH) = 43\%$       |

<sup>1</sup>American Association for Public Opinion Research. Final Dispositions of Case Codes and Outcome Rates for Surveys. Available at: [https://www.aapor.org/AAPOR\\_Main/media/publications/Standard-Definitions20169theditionfinal.pdf](https://www.aapor.org/AAPOR_Main/media/publications/Standard-Definitions20169theditionfinal.pdf) Accessed June 4, 2021

Supplementary Table S3 (st3). Spearman's correlations between level of trust in institutions. Strong, moderate and weak correlations are defined as  $\geq 0.50$ , 0.30–0.49 and 0.20–0.29, respectively.

|                                    | Hospitals | Medisave | Private genetic testing companies | Pharmaceutical companies | Private insurers | Facebook | IT Companies | Singapore medical societies | Government agencies | Ministry of Health | Universities / Research institutes | Overseas Universities |
|------------------------------------|-----------|----------|-----------------------------------|--------------------------|------------------|----------|--------------|-----------------------------|---------------------|--------------------|------------------------------------|-----------------------|
| Pharmacies                         | 0.549**   | 0.482**  | 0.396**                           | 0.528**                  | 0.393**          | 0.298**  | 0.322**      | 0.466**                     | 0.440**             | 0.444**            | 0.481**                            | 0.283**               |
| Hospitals                          |           | 0.845**  | 0.372**                           | 0.407**                  | 0.346**          | 0.095**  | 0.224**      | 0.731**                     | 0.806**             | 0.835**            | 0.740**                            | 0.309**               |
| Medisave                           |           |          | 0.345**                           | 0.392**                  | 0.354**          | 0.142**  | 0.248**      | 0.704**                     | 0.830**             | 0.831**            | 0.720**                            | 0.303**               |
| Private genetic testing companies  |           |          |                                   | 0.860**                  | 0.836**          | 0.489**  | 0.705**      | 0.309**                     | 0.348**             | 0.376**            | 0.344**                            | 0.790**               |
| Pharmaceutical companies           |           |          |                                   |                          | 0.830**          | 0.433**  | 0.669**      | 0.346**                     | 0.396**             | 0.436**            | 0.378**                            | 0.768**               |
| Private insurers                   |           |          |                                   |                          |                  | 0.511**  | 0.722**      | 0.296**                     | 0.336**             | 0.352**            | 0.322**                            | 0.766**               |
| Facebook                           |           |          |                                   |                          |                  |          | 0.821**      | 0.270**                     | 0.158**             | 0.111**            | 0.295**                            | 0.500**               |
| IT Companies                       |           |          |                                   |                          |                  |          |              | 0.307**                     | 0.265**             | 0.247**            | 0.323**                            | 0.761**               |
| Singapore medical societies        |           |          |                                   |                          |                  |          |              |                             | 0.776**             | 0.764**            | 0.829**                            | 0.329**               |
| Government agencies                |           |          |                                   |                          |                  |          |              |                             |                     | 0.932**            | 0.794**                            | 0.333**               |
| Ministry of Health                 |           |          |                                   |                          |                  |          |              |                             |                     |                    | 0.791**                            | 0.334**               |
| Universities / Research institutes |           |          |                                   |                          |                  |          |              |                             |                     |                    |                                    | 0.385**               |

\*\* . Correlation is significantly different from zero at the 0.01 significance level (2-tailed).

Supplementary Table S4 (st4). Summary of results from simulations of what proportion of respondents would deem a specific scenario acceptable. The scenarios that were found to be acceptable by  $\leq 49.9\%$  of the respondents are shaded in grey. The simulations were weighted for ethnicity according to Singapore's demographics (i.e. 76.0% Chinese, 15.0% Indian, 7.5% Malay and 1.5% Others).

| Scenario no. | Attribute level         |                                  |                                       |                                                                            | Proportion of respondents who found scenario acceptable | Proportion of respondents who found scenario unacceptable |
|--------------|-------------------------|----------------------------------|---------------------------------------|----------------------------------------------------------------------------|---------------------------------------------------------|-----------------------------------------------------------|
|              | Attribute level of uses | Attribute level of users         | Attribute level of consent            | Attribute level of data sensitivity                                        |                                                         |                                                           |
| 1            | Health research         | Government agencies              | Consent for every study               | De-identified genetic data and my de-identified electronic medical history | 87.8%                                                   | 12.2%                                                     |
| 2            | Health research         | Government agencies              | Consent for every study               | De-identified genetic data without my electronic medical history           | 87.0%                                                   | 13.0%                                                     |
| 3            | Health research         | Government agencies              | Consent for every study               | Identifiable genetic data and my electronic medical history                | 68.1%                                                   | 31.9%                                                     |
| 4            | Health research         | Government agencies              | Consent for every study               | Identifiable genetic data without my electronic medical history            | 69.0%                                                   | 31.0%                                                     |
| 5            | Health research         | Government agencies              | Consent for some specific studies     | De-identified genetic data and my de-identified electronic medical history | 88.1%                                                   | 11.9%                                                     |
| 6            | Health research         | Government agencies              | Consent for some specific studies     | De-identified genetic data without my electronic medical history           | 87.2%                                                   | 12.8%                                                     |
| 7            | Health research         | Government agencies              | Consent for some specific studies     | Identifiable genetic data and my electronic medical history                | 70.1%                                                   | 29.9%                                                     |
| 8            | Health research         | Government agencies              | Consent for some specific studies     | Identifiable genetic data without my electronic medical history            | 70.0%                                                   | 30.0%                                                     |
| 9            | Health research         | Government agencies              | Consent one-time only for all studies | De-identified genetic data and my de-identified electronic medical history | 77.6%                                                   | 22.4%                                                     |
| 10           | Health research         | Government agencies              | Consent one-time only for all studies | De-identified genetic data without my electronic medical history           | 75.8%                                                   | 24.2%                                                     |
| 11           | Health research         | Government agencies              | Consent one-time only for all studies | Identifiable genetic data and my electronic medical history                | 59.5%                                                   | 40.5%                                                     |
| 12           | Health research         | Government agencies              | Consent one-time only for all studies | Identifiable genetic data without my electronic medical history            | 58.5%                                                   | 41.5%                                                     |
| 13           | Health research         | Universities/Research institutes | Consent for every study               | De-identified genetic data and my de-identified electronic medical history | 65.8%                                                   | 34.2%                                                     |
| 14           | Health research         | Universities/Research institutes | Consent for every study               | De-identified genetic data without my electronic medical history           | 61.7%                                                   | 38.3%                                                     |
| 15           | Health research         | Universities/Research institutes | Consent for every study               | Identifiable genetic data and my electronic medical history                | 48.4%                                                   | 51.6%                                                     |
| 16           | Health research         | Universities/Research institutes | Consent for every study               | Identifiable genetic data without my electronic medical history            | 46.0%                                                   | 54.0%                                                     |
| 17           | Health research         | Universities/Research institutes | Consent for some specific studies     | De-identified genetic data and my de-identified electronic medical history | 65.4%                                                   | 34.6%                                                     |
| 18           | Health research         | Universities/Research institutes | Consent for some specific studies     | De-identified genetic data without my electronic medical history           | 61.3%                                                   | 38.7%                                                     |
| 19           | Health research         | Universities/Research institutes | Consent for some specific studies     | Identifiable genetic data and my electronic medical history                | 48.6%                                                   | 51.4%                                                     |
| 20           | Health research         | Universities/Research institutes | Consent for some specific studies     | Identifiable genetic data without my electronic medical history            | 46.2%                                                   | 53.8%                                                     |
| 21           | Health research         | Universities/Research institutes | Consent one-time only for all studies | De-identified genetic data and my de-identified electronic medical history | 53.9%                                                   | 46.1%                                                     |
| 22           | Health research         | Universities/Research institutes | Consent one-time only for all studies | De-identified genetic data without my electronic medical history           | 47.8%                                                   | 52.2%                                                     |
| 23           | Health research         | Universities/Research institutes | Consent one-time only for all studies | Identifiable genetic data and my electronic medical history                | 40.5%                                                   | 59.5%                                                     |
| 24           | Health research         | Universities/Research institutes | Consent one-time only for all studies | Identifiable genetic data without my electronic medical history            | 37.6%                                                   | 62.4%                                                     |
| 25           | Health research         | Hospitals                        | Consent for every study               | De-identified genetic data and my de-identified electronic medical history | 85.2%                                                   | 14.8%                                                     |
| 26           | Health research         | Hospitals                        | Consent for every study               | De-identified genetic data without my electronic medical history           | 84.0%                                                   | 16.0%                                                     |
| 27           | Health research         | Hospitals                        | Consent for every study               | Identifiable genetic data and my electronic medical history                | 64.5%                                                   | 35.5%                                                     |
| 28           | Health research         | Hospitals                        | Consent for every study               | Identifiable genetic data without my electronic medical history            | 65.3%                                                   | 34.7%                                                     |
| 29           | Health research         | Hospitals                        | Consent for some specific studies     | De-identified genetic data and my de-identified electronic medical history | 85.3%                                                   | 14.7%                                                     |

|    |                 |                                          |                                       |                                                                            |       |       |
|----|-----------------|------------------------------------------|---------------------------------------|----------------------------------------------------------------------------|-------|-------|
| 30 | Health research | Hospitals                                | Consent for some specific studies     | De-identified genetic data without my electronic medical history           | 83.7% | 16.3% |
| 31 | Health research | Hospitals                                | Consent for some specific studies     | Identifiable genetic data and my electronic medical history                | 66.0% | 34.0% |
| 32 | Health research | Hospitals                                | Consent for some specific studies     | Identifiable genetic data without my electronic medical history            | 66.0% | 34.0% |
| 33 | Health research | Hospitals                                | Consent one-time only for all studies | De-identified genetic data and my de-identified electronic medical history | 73.9% | 26.1% |
| 34 | Health research | Hospitals                                | Consent one-time only for all studies | De-identified genetic data without my electronic medical history           | 70.9% | 29.1% |
| 35 | Health research | Hospitals                                | Consent one-time only for all studies | Identifiable genetic data and my electronic medical history                | 55.3% | 44.7% |
| 36 | Health research | Hospitals                                | Consent one-time only for all studies | Identifiable genetic data without my electronic medical history            | 53.6% | 46.4% |
| 37 | Health research | Pharmaceutical / Biotechnology companies | Consent for every study               | De-identified genetic data and my de-identified electronic medical history | 48.5% | 51.5% |
| 38 | Health research | Pharmaceutical / Biotechnology companies | Consent for every study               | De-identified genetic data without my electronic medical history           | 40.8% | 59.2% |
| 39 | Health research | Pharmaceutical / Biotechnology companies | Consent for every study               | Identifiable genetic data and my electronic medical history                | 35.2% | 64.8% |
| 40 | Health research | Pharmaceutical / Biotechnology companies | Consent for every study               | Identifiable genetic data without my electronic medical history            | 31.1% | 68.9% |
| 41 | Health research | Pharmaceutical / Biotechnology companies | Consent for some specific studies     | De-identified genetic data and my de-identified electronic medical history | 49.2% | 50.8% |
| 42 | Health research | Pharmaceutical / Biotechnology companies | Consent for some specific studies     | De-identified genetic data without my electronic medical history           | 42.1% | 57.9% |
| 43 | Health research | Pharmaceutical / Biotechnology companies | Consent for some specific studies     | Identifiable genetic data and my electronic medical history                | 35.3% | 64.7% |
| 44 | Health research | Pharmaceutical / Biotechnology companies | Consent for some specific studies     | Identifiable genetic data without my electronic medical history            | 31.6% | 68.4% |
| 45 | Health research | Pharmaceutical / Biotechnology companies | Consent one-time only for all studies | De-identified genetic data and my de-identified electronic medical history | 38.4% | 61.6% |
| 46 | Health research | Pharmaceutical / Biotechnology companies | Consent one-time only for all studies | De-identified genetic data without my electronic medical history           | 30.5% | 69.5% |
| 47 | Health research | Pharmaceutical / Biotechnology companies | Consent one-time only for all studies | Identifiable genetic data and my electronic medical history                | 29.5% | 70.5% |
| 48 | Health research | Pharmaceutical / Biotechnology companies | Consent one-time only for all studies | Identifiable genetic data without my electronic medical history            | 26.1% | 73.9% |
| 49 | Health research | Private insurers                         | Consent for every study               | De-identified genetic data and my de-identified electronic medical history | 24.9% | 75.1% |
| 50 | Health research | Private insurers                         | Consent for every study               | De-identified genetic data without my electronic medical history           | 17.2% | 82.8% |
| 51 | Health research | Private insurers                         | Consent for every study               | Identifiable genetic data and my electronic medical history                | 20.5% | 79.5% |
| 52 | Health research | Private insurers                         | Consent for every study               | Identifiable genetic data without my electronic medical history            | 16.6% | 83.4% |
| 53 | Health research | Private insurers                         | Consent for some specific studies     | De-identified genetic data and my de-identified electronic medical history | 26.9% | 73.1% |
| 54 | Health research | Private insurers                         | Consent for some specific studies     | De-identified genetic data without my electronic medical history           | 19.8% | 80.2% |
| 55 | Health research | Private insurers                         | Consent for some specific studies     | Identifiable genetic data and my electronic medical history                | 20.8% | 79.2% |
| 56 | Health research | Private insurers                         | Consent for some specific studies     | Identifiable genetic data without my electronic medical history            | 17.6% | 82.4% |
| 57 | Health research | Private insurers                         | Consent one-time only for all studies | De-identified genetic data and my de-identified electronic medical history | 20.1% | 79.9% |

|    |                     |                                  |                                       |                                                                            |       |       |
|----|---------------------|----------------------------------|---------------------------------------|----------------------------------------------------------------------------|-------|-------|
| 58 | Health research     | Private insurers                 | Consent one-time only for all studies | De-identified genetic data without my electronic medical history           | 13.8% | 86.2% |
| 59 | Health research     | Private insurers                 | Consent one-time only for all studies | Identifiable genetic data and my electronic medical history                | 18.2% | 81.8% |
| 60 | Health research     | Private insurers                 | Consent one-time only for all studies | Identifiable genetic data without my electronic medical history            | 15.3% | 84.7% |
| 61 | Quality improvement | Government agencies              | Consent for every study               | De-identified genetic data and my de-identified electronic medical history | 79.5% | 20.5% |
| 62 | Quality improvement | Government agencies              | Consent for every study               | De-identified genetic data without my electronic medical history           | 76.4% | 23.6% |
| 63 | Quality improvement | Government agencies              | Consent for every study               | Identifiable genetic data and my electronic medical history                | 57.7% | 42.3% |
| 64 | Quality improvement | Government agencies              | Consent for every study               | Identifiable genetic data without my electronic medical history            | 57.0% | 43.0% |
| 65 | Quality improvement | Government agencies              | Consent for some specific studies     | De-identified genetic data and my de-identified electronic medical history | 79.1% | 20.9% |
| 66 | Quality improvement | Government agencies              | Consent for some specific studies     | De-identified genetic data without my electronic medical history           | 76.0% | 24.0% |
| 67 | Quality improvement | Government agencies              | Consent for some specific studies     | Identifiable genetic data and my electronic medical history                | 59.2% | 40.8% |
| 68 | Quality improvement | Government agencies              | Consent for some specific studies     | Identifiable genetic data without my electronic medical history            | 57.9% | 42.1% |
| 69 | Quality improvement | Government agencies              | Consent one-time only for all studies | De-identified genetic data and my de-identified electronic medical history | 66.7% | 33.3% |
| 70 | Quality improvement | Government agencies              | Consent one-time only for all studies | De-identified genetic data without my electronic medical history           | 62.3% | 37.7% |
| 71 | Quality improvement | Government agencies              | Consent one-time only for all studies | Identifiable genetic data and my electronic medical history                | 49.8% | 50.2% |
| 72 | Quality improvement | Government agencies              | Consent one-time only for all studies | Identifiable genetic data without my electronic medical history            | 47.8% | 52.2% |
| 73 | Quality improvement | Universities/Research institutes | Consent for every study               | De-identified genetic data and my de-identified electronic medical history | 51.1% | 48.9% |
| 74 | Quality improvement | Universities/Research institutes | Consent for every study               | De-identified genetic data without my electronic medical history           | 43.7% | 56.3% |
| 75 | Quality improvement | Universities/Research institutes | Consent for every study               | Identifiable genetic data and my electronic medical history                | 37.0% | 63.0% |
| 76 | Quality improvement | Universities/Research institutes | Consent for every study               | Identifiable genetic data without my electronic medical history            | 33.2% | 66.8% |
| 77 | Quality improvement | Universities/Research institutes | Consent for some specific studies     | De-identified genetic data and my de-identified electronic medical history | 51.4% | 48.6% |
| 78 | Quality improvement | Universities/Research institutes | Consent for some specific studies     | De-identified genetic data without my electronic medical history           | 44.6% | 55.4% |
| 79 | Quality improvement | Universities/Research institutes | Consent for some specific studies     | Identifiable genetic data and my electronic medical history                | 37.3% | 62.7% |
| 80 | Quality improvement | Universities/Research institutes | Consent for some specific studies     | Identifiable genetic data without my electronic medical history            | 33.9% | 66.1% |
| 81 | Quality improvement | Universities/Research institutes | Consent one-time only for all studies | De-identified genetic data and my de-identified electronic medical history | 40.4% | 59.6% |
| 82 | Quality improvement | Universities/Research institutes | Consent one-time only for all studies | De-identified genetic data without my electronic medical history           | 32.9% | 67.1% |
| 83 | Quality improvement | Universities/Research institutes | Consent one-time only for all studies | Identifiable genetic data and my electronic medical history                | 31.2% | 68.8% |
| 84 | Quality improvement | Universities/Research institutes | Consent one-time only for all studies | Identifiable genetic data without my electronic medical history            | 27.7% | 72.3% |
| 85 | Quality improvement | Hospitals                        | Consent for every study               | De-identified genetic data and my de-identified electronic medical history | 74.6% | 25.4% |
| 86 | Quality improvement | Hospitals                        | Consent for every study               | De-identified genetic data without my electronic medical history           | 70.0% | 30.0% |
| 87 | Quality improvement | Hospitals                        | Consent for every study               | Identifiable genetic data and my electronic medical history                | 53.3% | 46.7% |
| 88 | Quality improvement | Hospitals                        | Consent for every study               | Identifiable genetic data without my electronic medical history            | 51.6% | 48.4% |
| 89 | Quality improvement | Hospitals                        | Consent for some specific studies     | De-identified genetic data and my de-identified electronic medical history | 74.2% | 25.8% |
| 90 | Quality improvement | Hospitals                        | Consent for some specific studies     | De-identified genetic data without my electronic medical history           | 69.6% | 30.4% |
| 91 | Quality improvement | Hospitals                        | Consent for some specific studies     | Identifiable genetic data and my electronic medical history                | 54.0% | 46.0% |

|     |                     |                                          |                                       |                                                                            |       |       |
|-----|---------------------|------------------------------------------|---------------------------------------|----------------------------------------------------------------------------|-------|-------|
| 92  | Quality improvement | Hospitals                                | Consent for some specific studies     | Identifiable genetic data without my electronic medical history            | 52.1% | 47.9% |
| 93  | Quality improvement | Hospitals                                | Consent one-time only for all studies | De-identified genetic data and my de-identified electronic medical history | 61.1% | 38.9% |
| 94  | Quality improvement | Hospitals                                | Consent one-time only for all studies | De-identified genetic data without my electronic medical history           | 55.1% | 44.9% |
| 95  | Quality improvement | Hospitals                                | Consent one-time only for all studies | Identifiable genetic data and my electronic medical history                | 44.5% | 55.5% |
| 96  | Quality improvement | Hospitals                                | Consent one-time only for all studies | Identifiable genetic data without my electronic medical history            | 41.9% | 58.1% |
| 97  | Quality improvement | Pharmaceutical / Biotechnology companies | Consent for every study               | De-identified genetic data and my de-identified electronic medical history | 33.6% | 66.4% |
| 98  | Quality improvement | Pharmaceutical / Biotechnology companies | Consent for every study               | De-identified genetic data without my electronic medical history           | 25.5% | 74.5% |
| 99  | Quality improvement | Pharmaceutical / Biotechnology companies | Consent for every study               | Identifiable genetic data and my electronic medical history                | 26.0% | 74.0% |
| 100 | Quality improvement | Pharmaceutical / Biotechnology companies | Consent for every study               | Identifiable genetic data without my electronic medical history            | 21.5% | 78.5% |
| 101 | Quality improvement | Pharmaceutical / Biotechnology companies | Consent for some specific studies     | De-identified genetic data and my de-identified electronic medical history | 35.3% | 64.7% |
| 102 | Quality improvement | Pharmaceutical / Biotechnology companies | Consent for some specific studies     | De-identified genetic data without my electronic medical history           | 28.0% | 72.0% |
| 103 | Quality improvement | Pharmaceutical / Biotechnology companies | Consent for some specific studies     | Identifiable genetic data and my electronic medical history                | 26.0% | 74.0% |
| 104 | Quality improvement | Pharmaceutical / Biotechnology companies | Consent for some specific studies     | Identifiable genetic data without my electronic medical history            | 22.3% | 77.7% |
| 105 | Quality improvement | Pharmaceutical / Biotechnology companies | Consent one-time only for all studies | De-identified genetic data and my de-identified electronic medical history | 26.5% | 73.5% |
| 106 | Quality improvement | Pharmaceutical / Biotechnology companies | Consent one-time only for all studies | De-identified genetic data without my electronic medical history           | 19.5% | 80.5% |
| 107 | Quality improvement | Pharmaceutical / Biotechnology companies | Consent one-time only for all studies | Identifiable genetic data and my electronic medical history                | 22.4% | 77.6% |
| 108 | Quality improvement | Pharmaceutical / Biotechnology companies | Consent one-time only for all studies | Identifiable genetic data without my electronic medical history            | 19.0% | 81.0% |
| 109 | Quality improvement | Private insurers                         | Consent for every study               | De-identified genetic data and my de-identified electronic medical history | 15.6% | 84.4% |
| 110 | Quality improvement | Private insurers                         | Consent for every study               | De-identified genetic data without my electronic medical history           | 10.1% | 89.9% |
| 111 | Quality improvement | Private insurers                         | Consent for every study               | Identifiable genetic data and my electronic medical history                | 14.9% | 85.1% |
| 112 | Quality improvement | Private insurers                         | Consent for every study               | Identifiable genetic data without my electronic medical history            | 11.4% | 88.6% |
| 113 | Quality improvement | Private insurers                         | Consent for some specific studies     | De-identified genetic data and my de-identified electronic medical history | 17.9% | 82.1% |
| 114 | Quality improvement | Private insurers                         | Consent for some specific studies     | De-identified genetic data without my electronic medical history           | 12.8% | 87.2% |
| 115 | Quality improvement | Private insurers                         | Consent for some specific studies     | Identifiable genetic data and my electronic medical history                | 15.0% | 85.0% |
| 116 | Quality improvement | Private insurers                         | Consent for some specific studies     | Identifiable genetic data without my electronic medical history            | 12.3% | 87.7% |
| 117 | Quality improvement | Private insurers                         | Consent one-time only for all studies | De-identified genetic data and my de-identified electronic medical history | 13.2% | 86.8% |
| 118 | Quality improvement | Private insurers                         | Consent one-time only for all studies | De-identified genetic data without my electronic medical history           | 8.7%  | 91.3% |
| 119 | Quality improvement | Private insurers                         | Consent one-time only for all studies | Identifiable genetic data and my electronic medical history                | 13.6% | 86.4% |

|     |                        |                                  |                                       |                                                                            |       |       |
|-----|------------------------|----------------------------------|---------------------------------------|----------------------------------------------------------------------------|-------|-------|
| 120 | Quality improvement    | Private insurers                 | Consent one-time only for all studies | Identifiable genetic data without my electronic medical history            | 11.1% | 88.9% |
| 121 | Private commercial use | Government agencies              | Consent for every study               | De-identified genetic data and my de-identified electronic medical history | 37.1% | 62.9% |
| 122 | Private commercial use | Government agencies              | Consent for every study               | De-identified genetic data without my electronic medical history           | 28.9% | 71.1% |
| 123 | Private commercial use | Government agencies              | Consent for every study               | Identifiable genetic data and my electronic medical history                | 28.7% | 71.3% |
| 124 | Private commercial use | Government agencies              | Consent for every study               | Identifiable genetic data without my electronic medical history            | 24.3% | 75.7% |
| 125 | Private commercial use | Government agencies              | Consent for some specific studies     | De-identified genetic data and my de-identified electronic medical history | 38.5% | 61.5% |
| 126 | Private commercial use | Government agencies              | Consent for some specific studies     | De-identified genetic data without my electronic medical history           | 30.8% | 69.2% |
| 127 | Private commercial use | Government agencies              | Consent for some specific studies     | Identifiable genetic data and my electronic medical history                | 28.5% | 71.5% |
| 128 | Private commercial use | Government agencies              | Consent for some specific studies     | Identifiable genetic data without my electronic medical history            | 24.9% | 75.1% |
| 129 | Private commercial use | Government agencies              | Consent one-time only for all studies | De-identified genetic data and my de-identified electronic medical history | 29.3% | 70.7% |
| 130 | Private commercial use | Government agencies              | Consent one-time only for all studies | De-identified genetic data without my electronic medical history           | 22.2% | 77.8% |
| 131 | Private commercial use | Government agencies              | Consent one-time only for all studies | Identifiable genetic data and my electronic medical history                | 24.6% | 75.4% |
| 132 | Private commercial use | Government agencies              | Consent one-time only for all studies | Identifiable genetic data without my electronic medical history            | 21.3% | 78.7% |
| 133 | Private commercial use | Universities/Research institutes | Consent for every study               | De-identified genetic data and my de-identified electronic medical history | 15.4% | 84.6% |
| 134 | Private commercial use | Universities/Research institutes | Consent for every study               | De-identified genetic data without my electronic medical history           | 9.0%  | 91.0% |
| 135 | Private commercial use | Universities/Research institutes | Consent for every study               | Identifiable genetic data and my electronic medical history                | 13.7% | 86.3% |
| 136 | Private commercial use | Universities/Research institutes | Consent for every study               | Identifiable genetic data without my electronic medical history            | 9.6%  | 90.4% |
| 137 | Private commercial use | Universities/Research institutes | Consent for some specific studies     | De-identified genetic data and my de-identified electronic medical history | 17.5% | 82.5% |
| 138 | Private commercial use | Universities/Research institutes | Consent for some specific studies     | De-identified genetic data without my electronic medical history           | 11.7% | 88.3% |
| 139 | Private commercial use | Universities/Research institutes | Consent for some specific studies     | Identifiable genetic data and my electronic medical history                | 13.6% | 86.4% |
| 140 | Private commercial use | Universities/Research institutes | Consent for some specific studies     | Identifiable genetic data without my electronic medical history            | 10.5% | 89.5% |
| 141 | Private commercial use | Universities/Research institutes | Consent one-time only for all studies | De-identified genetic data and my de-identified electronic medical history | 12.7% | 87.3% |
| 142 | Private commercial use | Universities/Research institutes | Consent one-time only for all studies | De-identified genetic data without my electronic medical history           | 7.6%  | 92.4% |
| 143 | Private commercial use | Universities/Research institutes | Consent one-time only for all studies | Identifiable genetic data and my electronic medical history                | 12.3% | 87.7% |
| 144 | Private commercial use | Universities/Research institutes | Consent one-time only for all studies | Identifiable genetic data without my electronic medical history            | 9.7%  | 90.3% |
| 145 | Private commercial use | Hospitals                        | Consent for every study               | De-identified genetic data and my de-identified electronic medical history | 28.7% | 71.3% |
| 146 | Private commercial use | Hospitals                        | Consent for every study               | De-identified genetic data without my electronic medical history           | 20.2% | 79.8% |
| 147 | Private commercial use | Hospitals                        | Consent for every study               | Identifiable genetic data and my electronic medical history                | 23.0% | 77.0% |
| 148 | Private commercial use | Hospitals                        | Consent for every study               | Identifiable genetic data without my electronic medical history            | 17.9% | 82.1% |
| 149 | Private commercial use | Hospitals                        | Consent for some specific studies     | De-identified genetic data and my de-identified electronic medical history | 30.4% | 69.6% |
| 150 | Private commercial use | Hospitals                        | Consent for some specific studies     | De-identified genetic data without my electronic medical history           | 22.5% | 77.5% |
| 151 | Private commercial use | Hospitals                        | Consent for some specific studies     | Identifiable genetic data and my electronic medical history                | 22.6% | 77.4% |
| 152 | Private commercial use | Hospitals                        | Consent for some specific studies     | Identifiable genetic data without my electronic medical history            | 18.3% | 81.7% |
| 153 | Private commercial use | Hospitals                        | Consent one-time only for all studies | De-identified genetic data and my de-identified electronic medical history | 21.9% | 78.1% |

|     |                        |                                          |                                       |                                                                            |       |       |
|-----|------------------------|------------------------------------------|---------------------------------------|----------------------------------------------------------------------------|-------|-------|
| 154 | Private commercial use | Hospitals                                | Consent one-time only for all studies | De-identified genetic data without my electronic medical history           | 15.1% | 84.9% |
| 155 | Private commercial use | Hospitals                                | Consent one-time only for all studies | Identifiable genetic data and my electronic medical history                | 19.6% | 80.4% |
| 156 | Private commercial use | Hospitals                                | Consent one-time only for all studies | Identifiable genetic data without my electronic medical history            | 15.9% | 84.1% |
| 157 | Private commercial use | Pharmaceutical / Biotechnology companies | Consent for every study               | De-identified genetic data and my de-identified electronic medical history | 8.2%  | 91.8% |
| 158 | Private commercial use | Pharmaceutical / Biotechnology companies | Consent for every study               | De-identified genetic data without my electronic medical history           | 4.2%  | 95.8% |
| 159 | Private commercial use | Pharmaceutical / Biotechnology companies | Consent for every study               | Identifiable genetic data and my electronic medical history                | 8.6%  | 91.4% |
| 160 | Private commercial use | Pharmaceutical / Biotechnology companies | Consent for every study               | Identifiable genetic data without my electronic medical history            | 5.4%  | 94.6% |
| 161 | Private commercial use | Pharmaceutical / Biotechnology companies | Consent for some specific studies     | De-identified genetic data and my de-identified electronic medical history | 9.7%  | 90.3% |
| 162 | Private commercial use | Pharmaceutical / Biotechnology companies | Consent for some specific studies     | De-identified genetic data without my electronic medical history           | 5.7%  | 94.3% |
| 163 | Private commercial use | Pharmaceutical / Biotechnology companies | Consent for some specific studies     | Identifiable genetic data and my electronic medical history                | 8.0%  | 92.0% |
| 164 | Private commercial use | Pharmaceutical / Biotechnology companies | Consent for some specific studies     | Identifiable genetic data without my electronic medical history            | 5.8%  | 94.2% |
| 165 | Private commercial use | Pharmaceutical / Biotechnology companies | Consent one-time only for all studies | De-identified genetic data and my de-identified electronic medical history | 7.0%  | 93.0% |
| 166 | Private commercial use | Pharmaceutical / Biotechnology companies | Consent one-time only for all studies | De-identified genetic data without my electronic medical history           | 3.6%  | 96.4% |
| 167 | Private commercial use | Pharmaceutical / Biotechnology companies | Consent one-time only for all studies | Identifiable genetic data and my electronic medical history                | 7.8%  | 92.2% |
| 168 | Private commercial use | Pharmaceutical / Biotechnology companies | Consent one-time only for all studies | Identifiable genetic data without my electronic medical history            | 5.7%  | 94.3% |
| 169 | Private commercial use | Private insurers                         | Consent for every study               | De-identified genetic data and my de-identified electronic medical history | 3.3%  | 96.7% |
| 170 | Private commercial use | Private insurers                         | Consent for every study               | De-identified genetic data without my electronic medical history           | 1.9%  | 98.1% |
| 171 | Private commercial use | Private insurers                         | Consent for every study               | Identifiable genetic data and my electronic medical history                | 5.0%  | 95.0% |
| 172 | Private commercial use | Private insurers                         | Consent for every study               | Identifiable genetic data without my electronic medical history            | 3.2%  | 96.8% |
| 173 | Private commercial use | Private insurers                         | Consent for some specific studies     | De-identified genetic data and my de-identified electronic medical history | 4.3%  | 95.7% |
| 174 | Private commercial use | Private insurers                         | Consent for some specific studies     | De-identified genetic data without my electronic medical history           | 2.6%  | 97.4% |
| 175 | Private commercial use | Private insurers                         | Consent for some specific studies     | Identifiable genetic data and my electronic medical history                | 4.7%  | 95.3% |
| 176 | Private commercial use | Private insurers                         | Consent for some specific studies     | Identifiable genetic data without my electronic medical history            | 3.4%  | 96.6% |
| 177 | Private commercial use | Private insurers                         | Consent one-time only for all studies | De-identified genetic data and my de-identified electronic medical history | 3.3%  | 96.7% |
| 178 | Private commercial use | Private insurers                         | Consent one-time only for all studies | De-identified genetic data without my electronic medical history           | 1.8%  | 98.2% |
| 179 | Private commercial use | Private insurers                         | Consent one-time only for all studies | Identifiable genetic data and my electronic medical history                | 4.8%  | 95.2% |
| 180 | Private commercial use | Private insurers                         | Consent one-time only for all studies | Identifiable genetic data without my electronic medical history            | 3.5%  | 96.5% |



Supplementary Table S6 (st6). Further details on the survey recruitment process.

| Further details on the survey recruitment process                                                                                                                                                                                                                                                                                                                                                                                                                                                                                                                                                                                                                                                                                                                                              |
|------------------------------------------------------------------------------------------------------------------------------------------------------------------------------------------------------------------------------------------------------------------------------------------------------------------------------------------------------------------------------------------------------------------------------------------------------------------------------------------------------------------------------------------------------------------------------------------------------------------------------------------------------------------------------------------------------------------------------------------------------------------------------------------------|
| Twenty development guide plans (DGPs) with five primary sampling units (PSUs) Primary Sampling Units (stratified by dwelling type) in each, were selected. These 100 PSUs are representative of the dwelling-type distribution in Singapore and each of those had four add-on units selected using a one floor up or down approach to ensure the same house type was selected. One respondent was chosen from the selected household and screened according to the eligibility criteria, i.e., population quota breakdown by age, sex and race. In the event that the household was not eligible (outright refusal; no eligible respondent based on quota; no response after three attempts across different days and times), a replacement unit was sought to the right of the selected unit. |
